# Supplementary material for: Self-templated fabrication of P-doped CoMoO4–Co3O4 hollow nanocages for the efficient oxygen evolution reaction
Source: Royal Society of Chemistry journal article supplement (doi:10.1039/d4nr03347g), 2024-01-01
Supplement: d4nr03347g1.pdf [file d4nr03347g1.pdf]

## Supporting information

Self-templated fabrication of P-doped  $\text{CoMoO}_4\text{-Co}_3\text{O}_4$  hollow nanocages for the efficient oxygen evolution reaction

Wenzhi Jia <sup>a</sup>, Qian Lu <sup>a</sup>, Tian Tian <sup>a</sup>, Guoxiang Pan <sup>a</sup>, Rui Tan <sup>c</sup>, Bin He <sup>a\*</sup>, Jiang Liu <sup>b\*</sup>

<sup>a</sup> Huzhou Key Laboratory of Environmental Functional Materials and Pollution Control, Department of Materials Engineering, Huzhou University, Huzhou 313000, China

<sup>b</sup> School of Chemistry, South China Normal University, Guangzhou 510006, China

<sup>c</sup> Warwick Electrochemical Engineering Group, WMG, Energy Innovation Centre, University of Warwick, Warwick, CV47AL, UK

Corresponding author.

\* E-mail address: binhe@zjhu.edu.cn (B. He); liuj0828@m.scnu.edu.cn

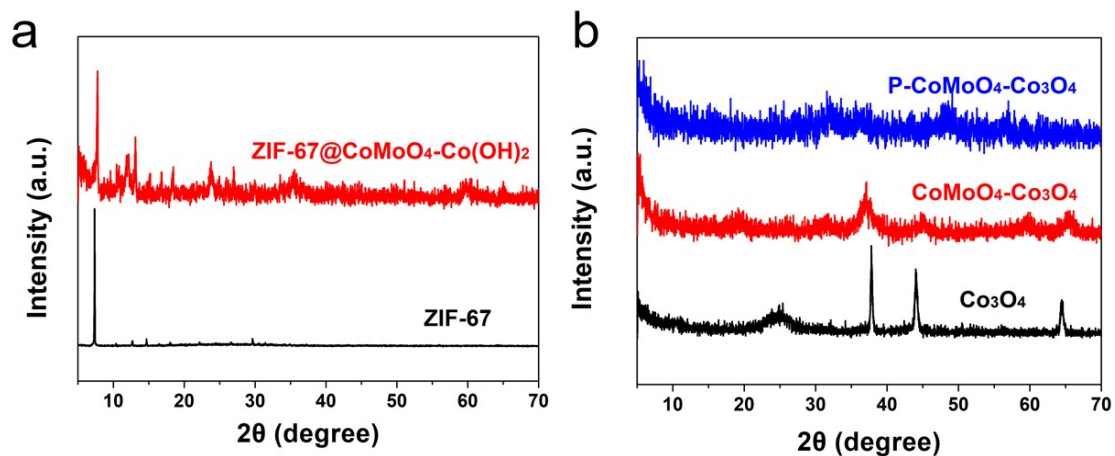

Fig. S1 XRD patterns of prepared samples. a) ZIF-67 and ZIF-67@CoMoO<sub>4</sub>-Co(OH)<sub>2</sub>, b) Co<sub>3</sub>O<sub>4</sub>, CoMoO<sub>4</sub>-Co<sub>3</sub>O<sub>4</sub> and P-CoMoO<sub>4</sub>-Co<sub>3</sub>O<sub>4</sub>.

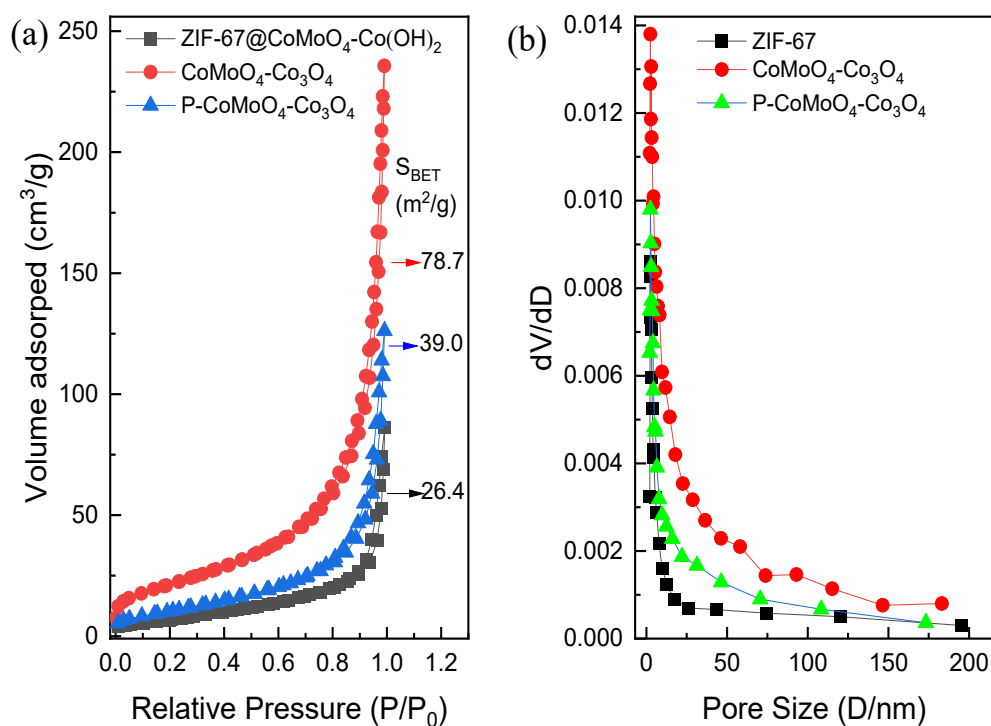

Fig. S2 (a) N<sub>2</sub> adsorption-desorption isotherms, BET areas, (b) pore diameter distribution of ZIF-67@CoMoO<sub>4</sub>-Co(OH)<sub>2</sub>, CoMoO<sub>4</sub>-Co<sub>3</sub>O<sub>4</sub> and P-CoMoO<sub>4</sub>-Co<sub>3</sub>O<sub>4</sub>.

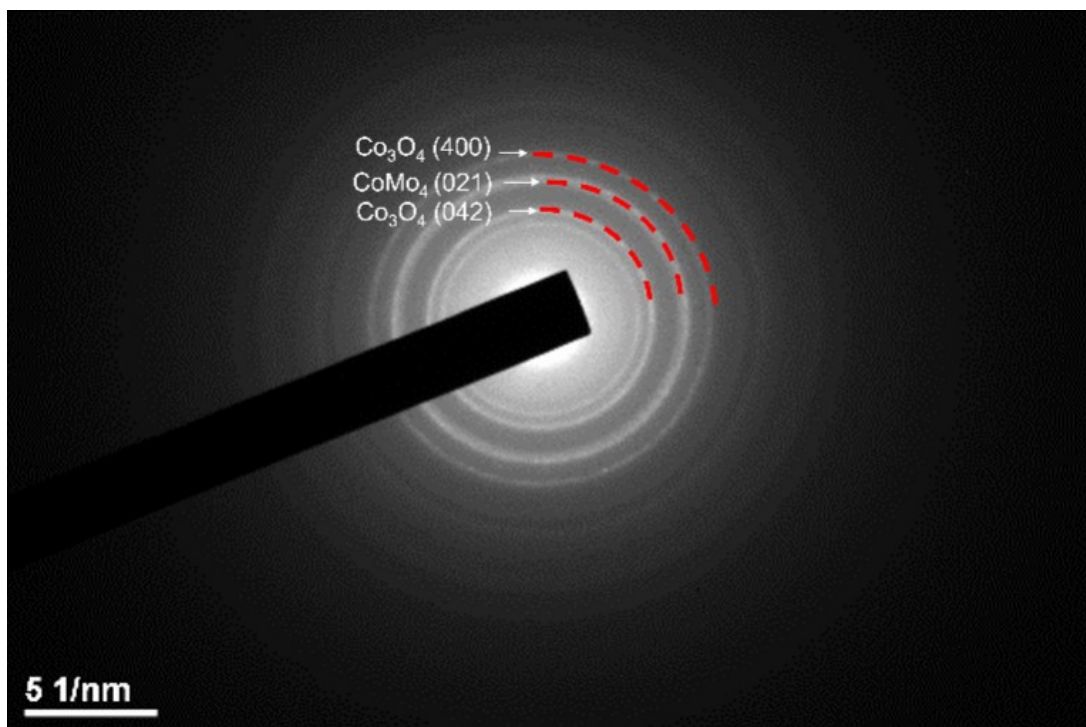

Fig. S3 SAED pattern of P-CoMoO<sub>4</sub>-Co<sub>3</sub>O<sub>4</sub>.

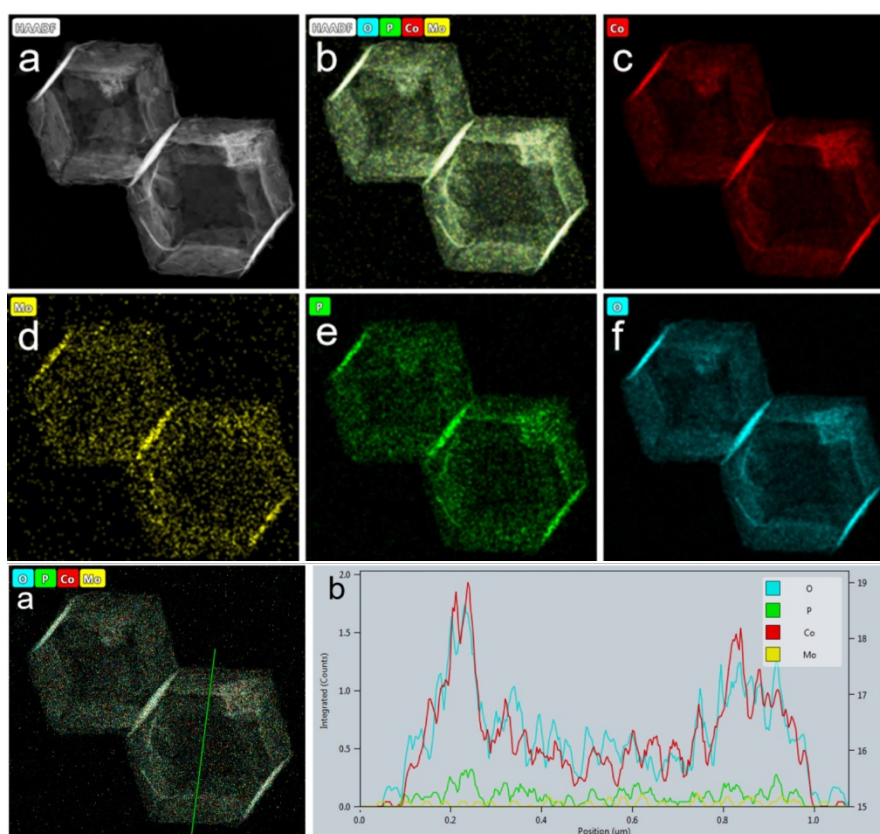

Fig. S4 EDX cross-sectional line scan profiles of the of P-CoMoO<sub>4</sub>-Co<sub>3</sub>O<sub>4</sub>.

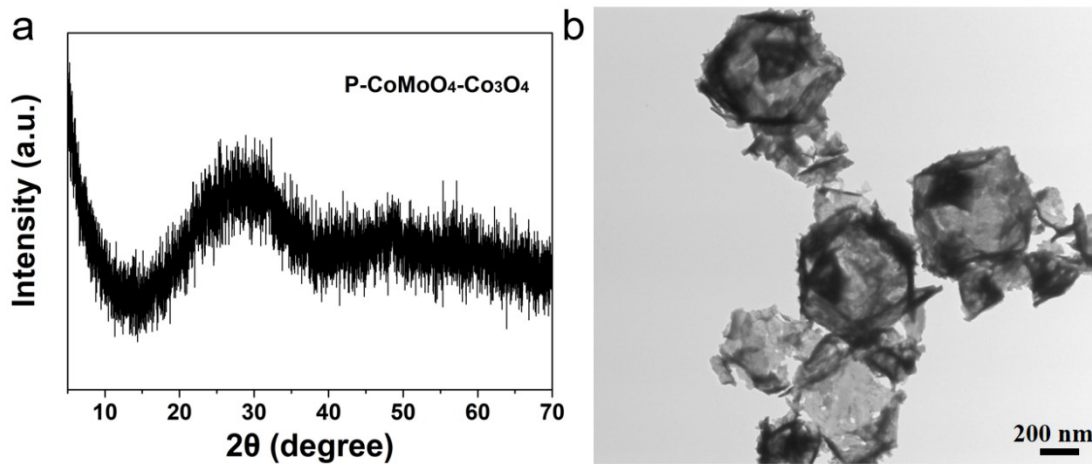

Fig. S5 XRD patterns and TEM images of the used P-Co<sub>3</sub>O<sub>4</sub>/CoMoO<sub>4</sub> HNC.

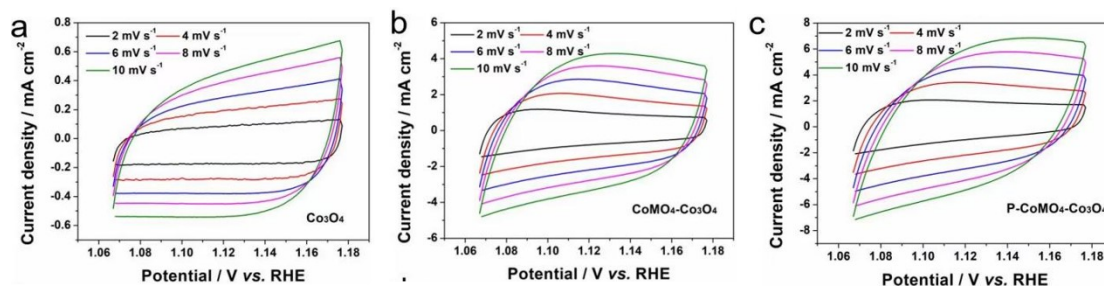

Fig. S6 Cyclic voltammetry of a) Co<sub>3</sub>O<sub>4</sub>, b) CoMoO<sub>4</sub>-Co<sub>3</sub>O<sub>4</sub> and c) P-CoMoO<sub>4</sub>-Co<sub>3</sub>O<sub>4</sub> and d) Values of the electrochemical double layer capacitance (Cdl).

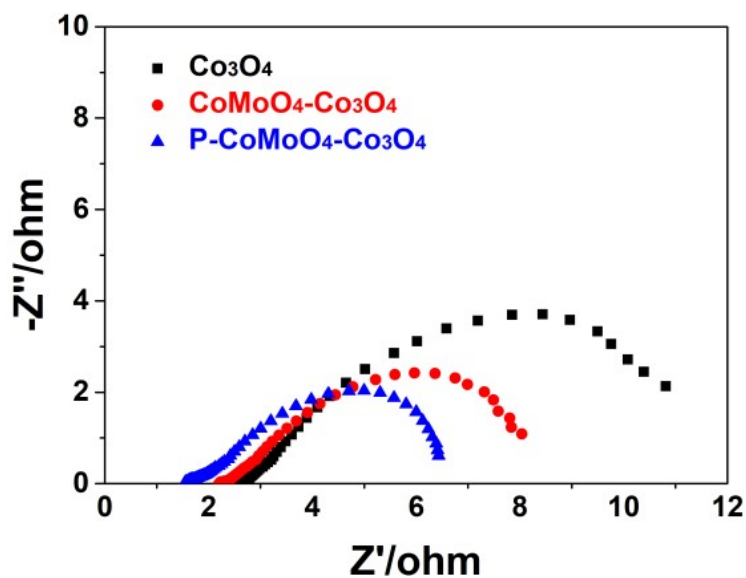

Fig. S7 EIS Nyquist diagram of Co<sub>3</sub>O<sub>4</sub>, CoMoO<sub>4</sub>-Co<sub>3</sub>O<sub>4</sub> and P-CoMoO<sub>4</sub>-Co<sub>3</sub>O<sub>4</sub>.

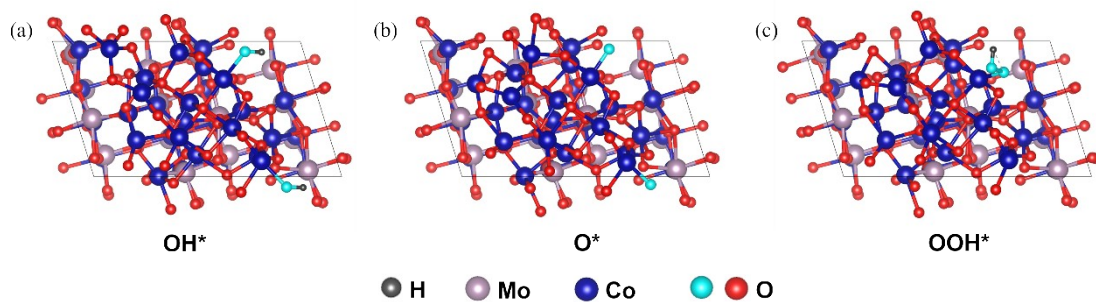

Fig. S8 The top view and side view of the (a) OH\*, (b) O\* and (c) OOH\* structures on CoMoO<sub>4</sub>-Co<sub>3</sub>O<sub>4</sub> in OER.

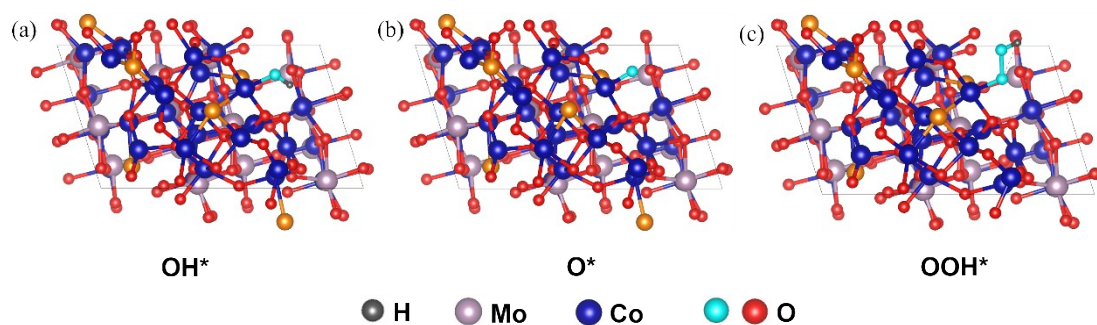

Fig. S9 The top view and side view of the (a) OH\*, (b) O\* and (c) OOH\* structures on P-CoMoO<sub>4</sub>-Co<sub>3</sub>O<sub>4</sub> in OER.

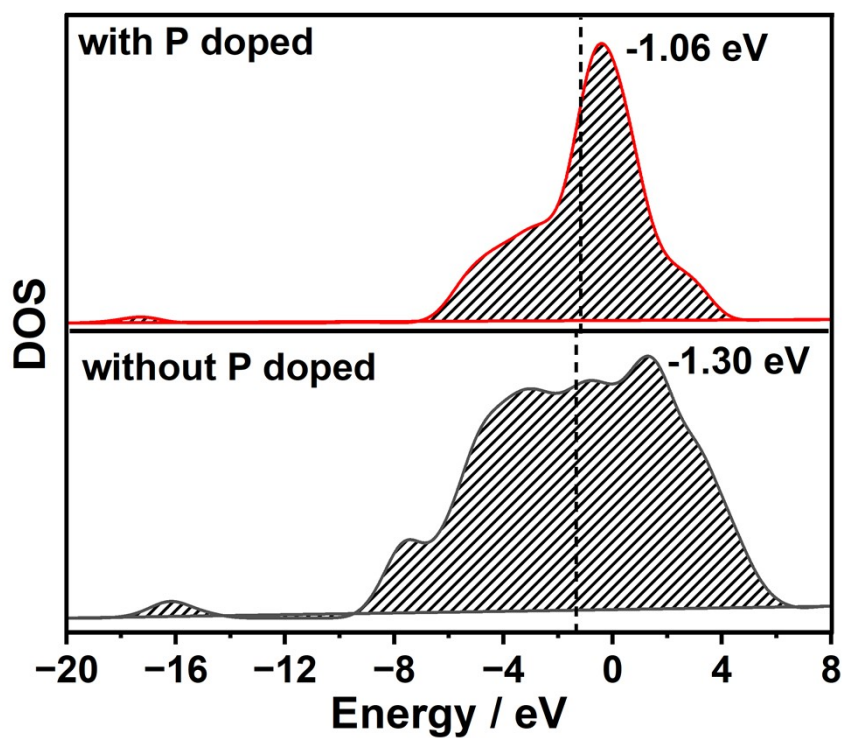

Fig. S10. Calculated density of states (DOS) of Co-3d in P-CoMoO<sub>4</sub>-Co<sub>3</sub>O<sub>4</sub> and CoMoO<sub>4</sub>-Co<sub>3</sub>O<sub>4</sub>.

**Table S1** OER performances comparison of recently reported representative electrocatalysts in alkaline medium (1.0 M KOH, at 10 mA cm<sup>-2</sup>).

| Catalyst                                                 | Overpotential (mV) | Reference                                     |
|----------------------------------------------------------|--------------------|-----------------------------------------------|
| P-CoMoO <sub>4</sub> -Co <sub>3</sub> O <sub>4</sub>     | 279                | This work                                     |
| Co/CoP                                                   | 340                | [1] Adv. Energy Mater. 7 (2017) 1602355.      |
| Ni <sub>3</sub> ZnC <sub>0.7</sub> /NCNT-700             | 380                | [2] Carbon 148 (2019) 496–503.                |
| CoNiP/CoNi                                               | 300                | [3] ChemSusChem 14(2021) 1921–1935.           |
| N doped NiS/NiS <sub>2</sub>                             | 270                | [4] Chem. Eng. J. 397 (2020) 125507.          |
| MnCo@NiS                                                 | 286                | [5] J. Power Sources 489 (2021) 229525.       |
| Mn <sub>13</sub> -NS/NF(Ni foam)                         | 357                | [6] ACS Appl. Nano Mater. 5 (2022) 326–330.   |
| NiOOH/Ni <sub>3</sub> S <sub>2</sub> /NF                 | 255                | [7] Mater. Today Energy (2022) 101008.        |
| Ni <sub>2</sub> P-Ni <sub>3</sub> S <sub>2</sub> HNAs/NF | 210                | [8] ACS Catal. 8 (2018) 8107–8114.            |
| Ni(Co)(Fe)OxHy                                           | 278                | [9] Nano Res. 12 (2019) 2288–2295.            |
| NiS/Ni interface                                         | 301                | [10] J. Mater. Sci. Technol. 42 (2020) 10–16. |
